# Supplementary material for: Predictors of responses to immune checkpoint blockade in advanced melanoma
Source: PubMed Central journal article supplement (PMC5605517; doi:10.1038/s41467-017-00608-2), 2017-09-19
Supplement: 41467_2017_608_MOESM1_ESM.pdf [file 41467_2017_608_MOESM1_ESM.pdf]

### **Description of Supplementary Files**

File Name: Supplementary Information

Description: Supplementary Figures and Supplementary Tables

Supplementary Fig.1

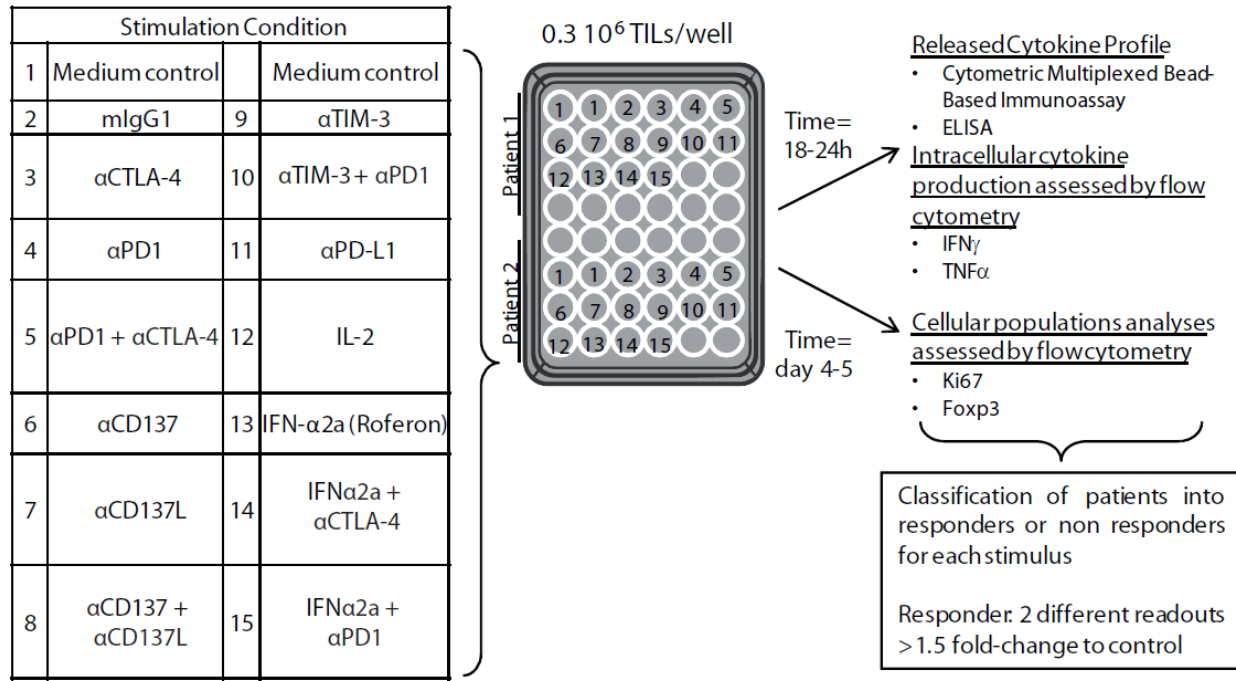

**Supplementary Figure 1. Experimental setting of the « *ex vivo* mLN assay ».** Metastatic lymph nodes (mLN) containing 4-98% melanoma tumor cells were resected, freshly mechanically and enzymatically dissociated using the Miltenyi Gentle MACs equipment for 1 hour at 37°C under rotation (2 incubation steps of 30 minutes). Whole cell suspensions were incubated in duplicate (one for the 18-24 h readout and one for the 4-5 day readout) wells at  $0.3 \times 10^6$ /ml with medium, versus isotype control mAb or a series of antagonistic or agonistic mAbs, combinations, or recombinant cytokines, as outlined. The *ex vivo* stimulation lasted 18-24 h (except in 2 cases where it lasted 48 h) before flow cytometric analyses of live CD45<sup>+</sup> cells, within CD3<sup>+</sup>CD4<sup>+</sup>, CD3<sup>+</sup>CD8<sup>+</sup> or CD3<sup>-</sup>CD56<sup>+</sup> cell gates for intracellular staining of Th1 cytokines (IFN $\gamma$ , TNF $\alpha$ ) after a final 3-5hr activation with PMA ionomycin and GolgiStop. The 18-24 hr cytokine release was monitored by commercial ELISA or multiplex arrays. The day 4-5 timepoint was crucial for monitoring proliferation, by flow cytometric analyses of Ki67 on T, NK, and Treg populations.

Supplementary Fig. 2

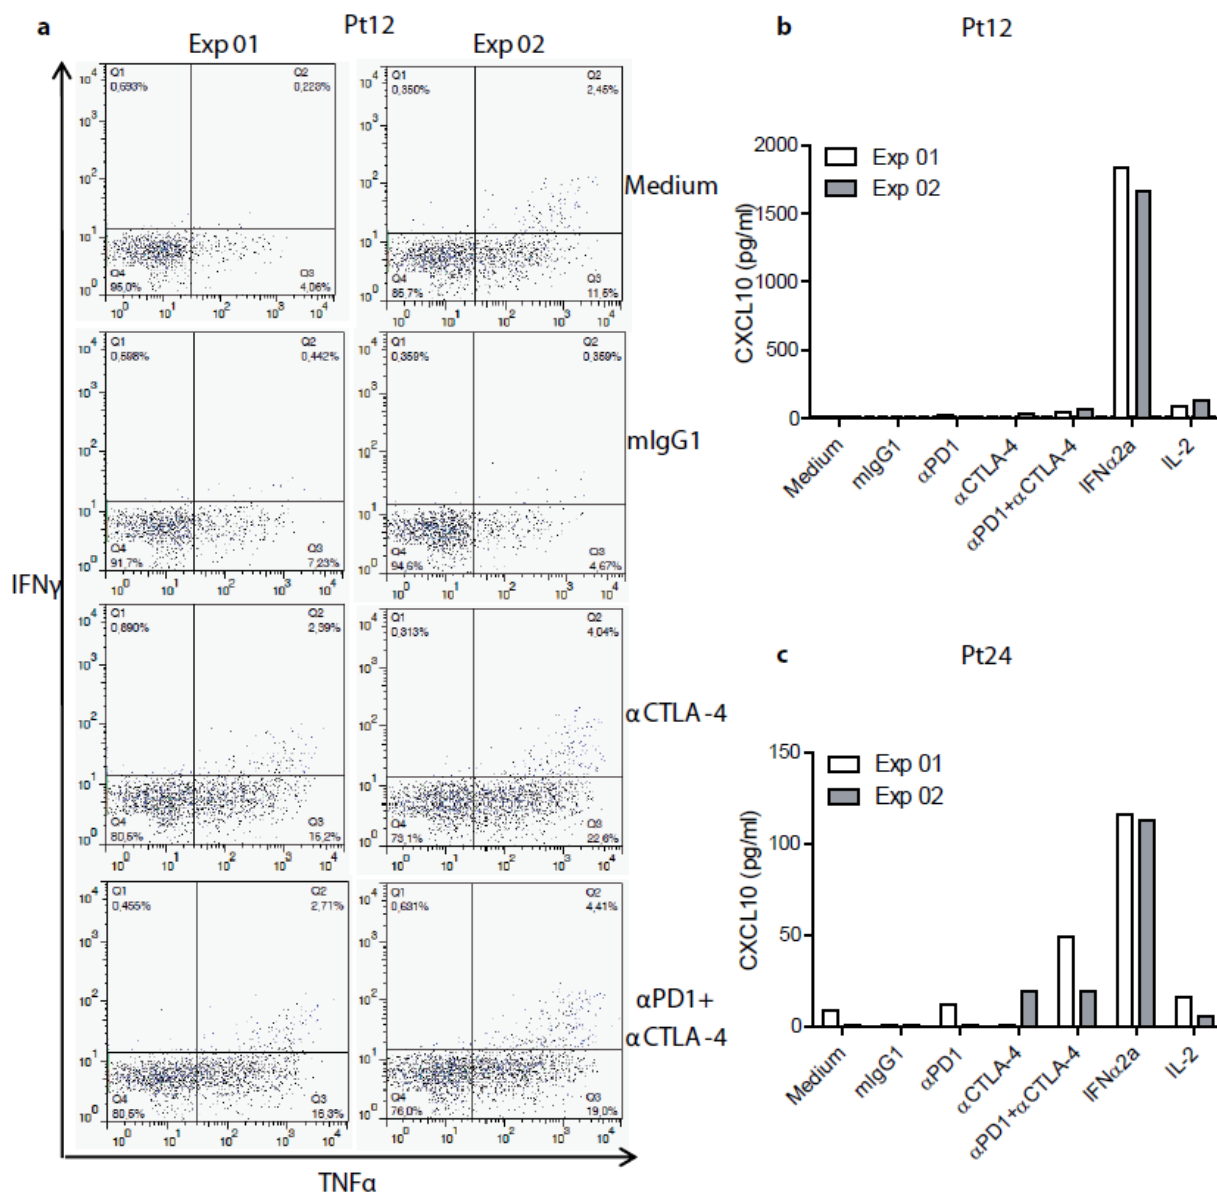

**Supplementary Figure 2. Inter-individual variations in specimen handling and data harvesting in two patient lesions.** Exemplification of positive scoring in several immunometrics for two patients using different *ex vivo* stimulations performed in parallel, independent experiments by the two first authors of the paper to cross-validate the findings and data mining approach. Flow cytometry dot plots are shown for the experiments performed by each individual on one patient (**a**), and CXCL10 dosage by ELISA performed by both individuals on two patient lesions (**b,c**).

Supplementary Fig.3

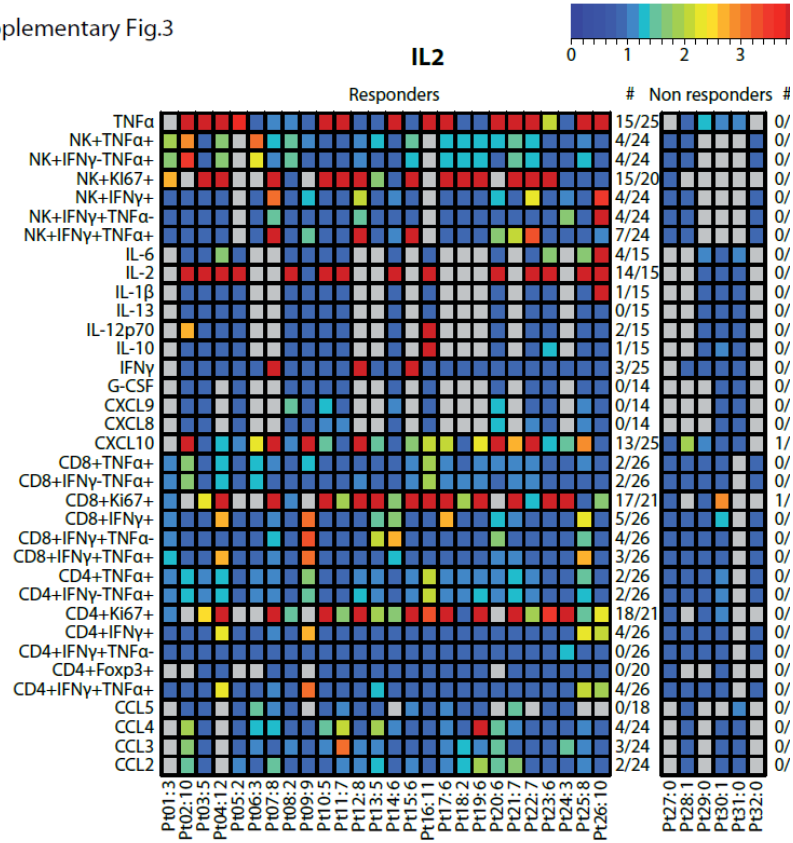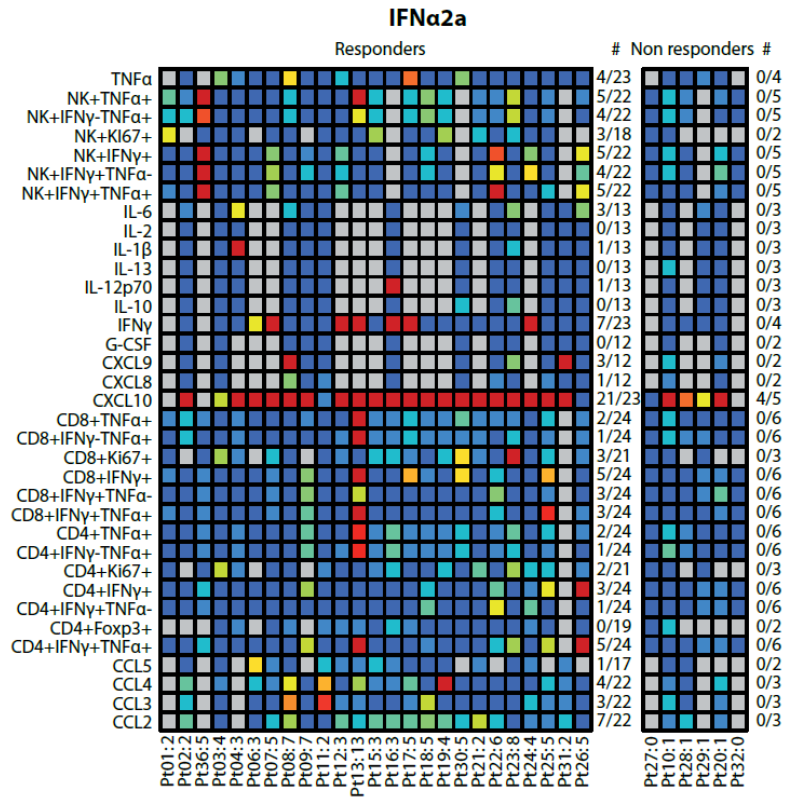

**Supplementary Figure 3. Heatmaps segregating responding versus non-responding patient lesions in each stimulation axis (IL-2, IFN $\alpha$ 2a).** Heatmap depicting the immunometrics scoring in the IL-2 and IFN $\alpha$ 2a stimulation axes. For improved readability of the scoring heatmap, patients are segregated according to their response lesions for the IL-2 and IFN $\alpha$ 2a stimulation axes. Each column represents a patient and each row a parameter (an immunometric). Grey cells indicate that the marker could not be evaluated for the corresponding patient. The total sums of positive immunometrics (out of the number of evaluated immunometrics) are shown for each marker (y-axis) or patient (x-axis). The most representative data for each axis are plotted on a graph appearing in Fig. 1.

Supplementary Fig. 4

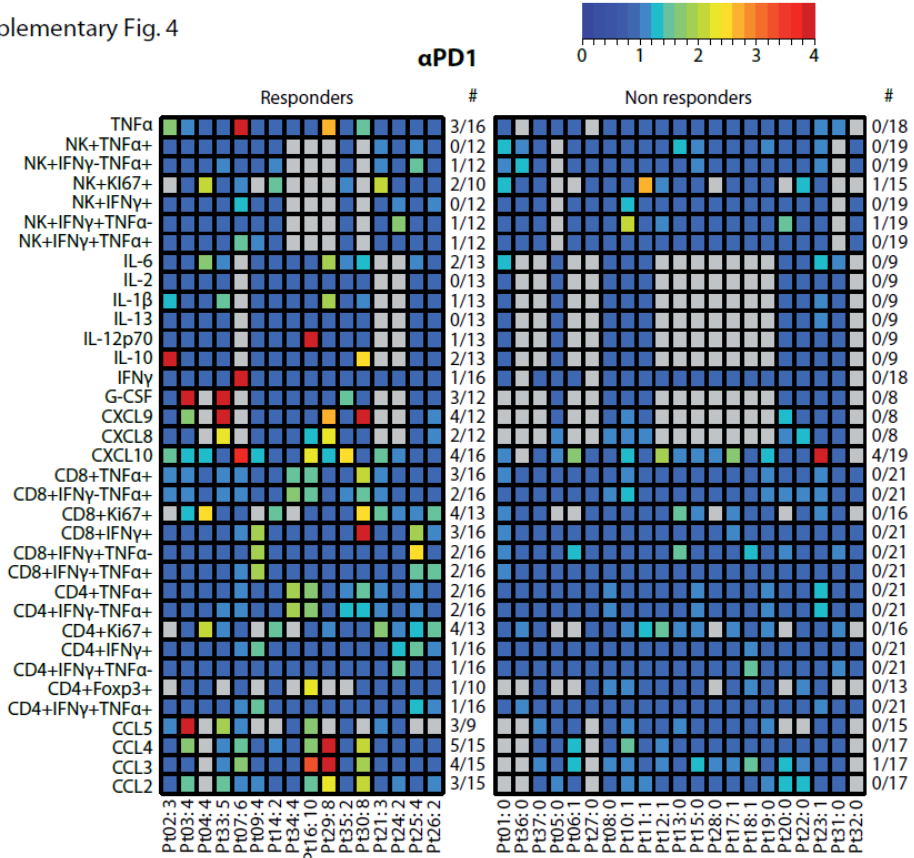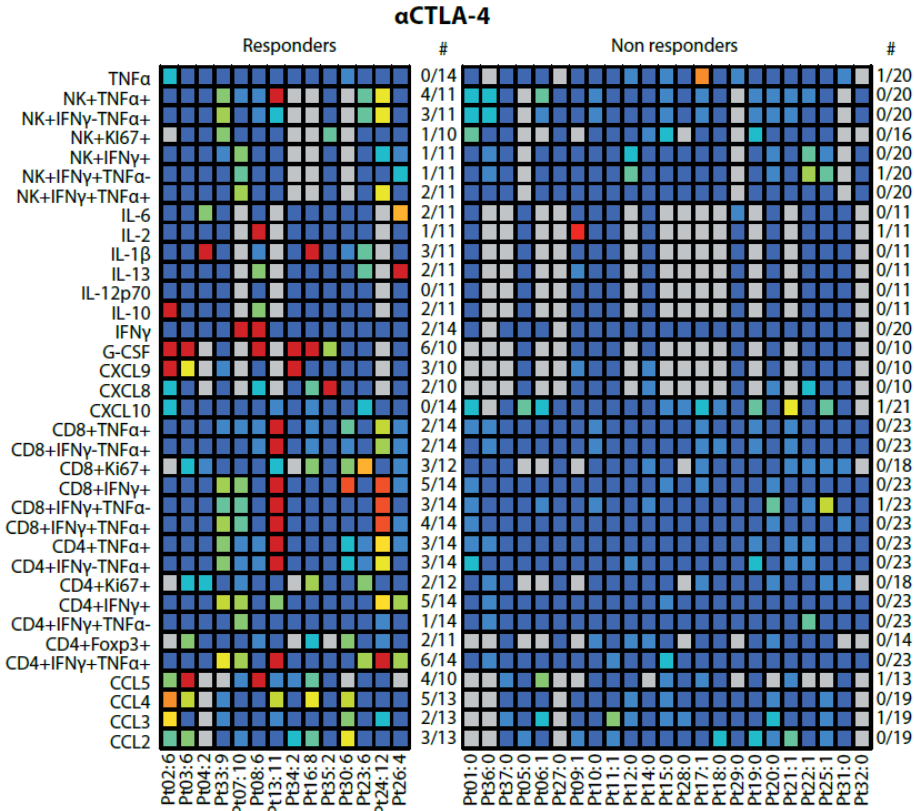

**Supplementary Figure 4. Heatmaps segregating responding versus non-responding patient lesions in each stimulation axis ( $\alpha$ PD-1,  $\alpha$ CTLA-4).** Heatmap depicting the immunometrics scoring in the  $\alpha$ PD-1 and  $\alpha$ CTLA-4 stimulation axes. Each column represents a patient and each row a parameter (an immunometric). Grey cells indicate that the marker could not be evaluated for the corresponding patient. The total sums of positive immunometrics (out of the number of evaluated immunometrics) are shown for each marker (y-axis) or patient (x-axis). The most representative data for each axis are plotted on a graph in Fig. 1.

Supplementary Fig. 5

**αPD1+αCTLA-4**

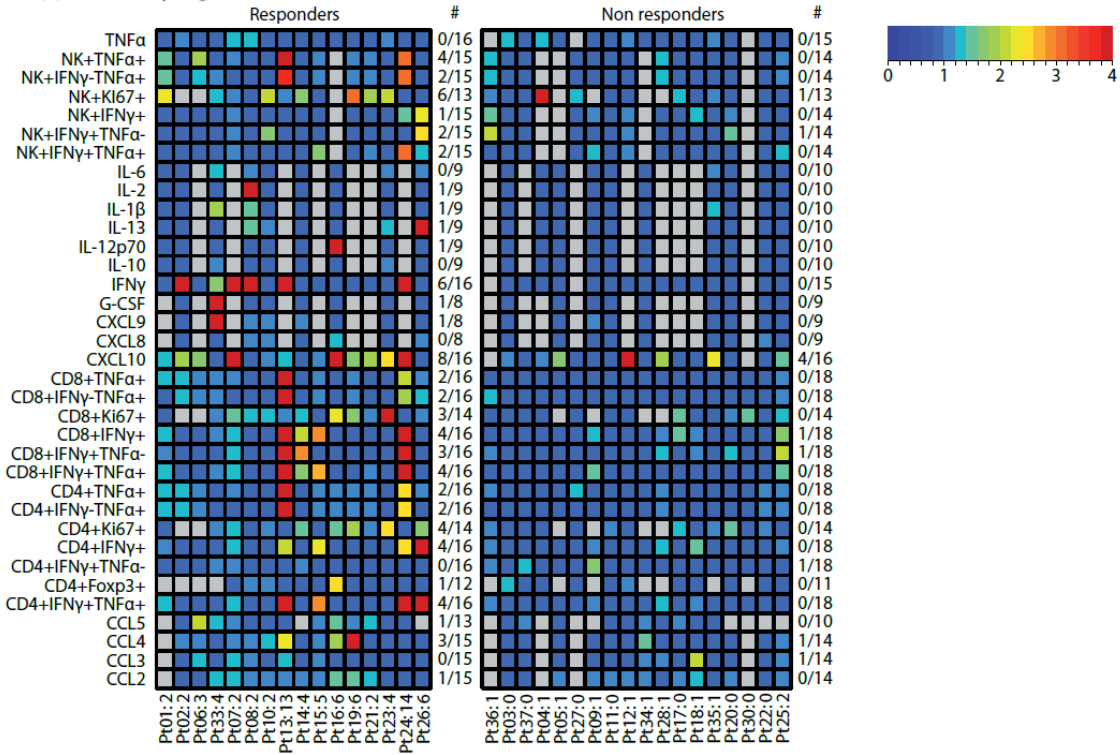

**αCD137/CD137L**

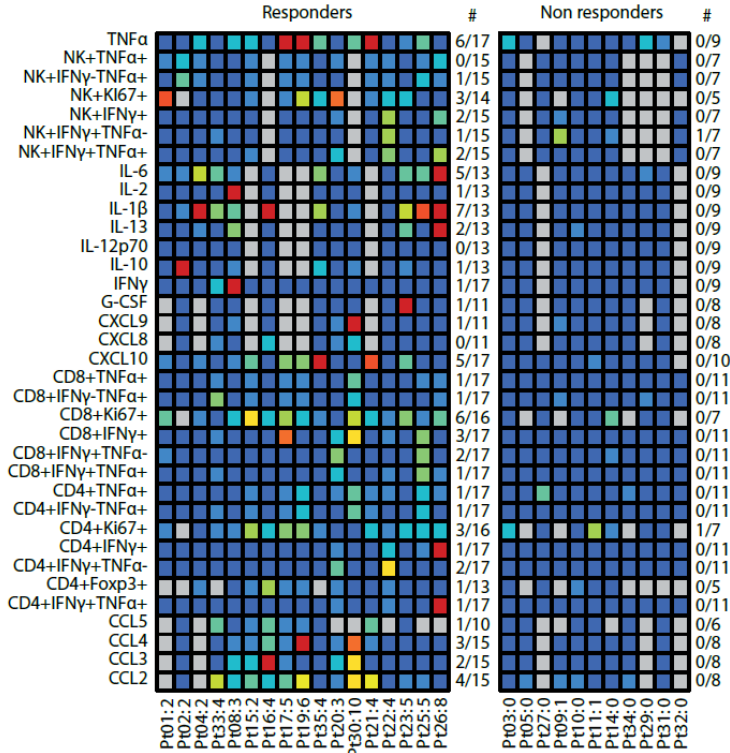

**αTIM-3**

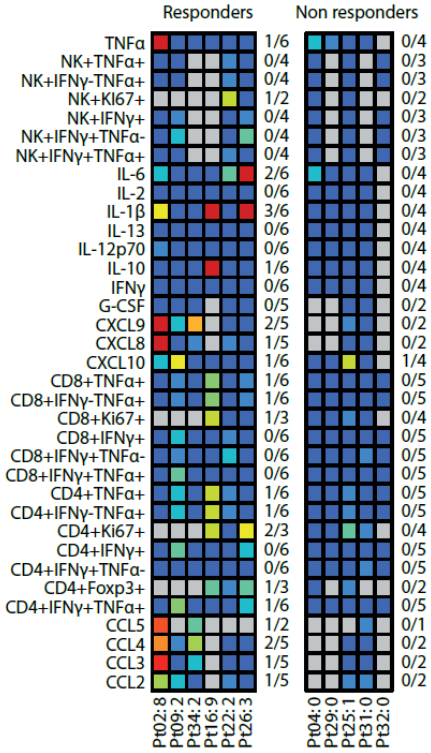



**Supplementary Figure 5. Heatmaps segregating responding versus non-responding patient lesions in each stimulation axis ( $\alpha$ CTLA-4+ $\alpha$ PD-1,  $\alpha$ CD137/CD137L,  $\alpha$ Tim-3).** Heatmap depicting the immunometrics scoring in the  $\alpha$ CTLA-4+ $\alpha$ PD-1,  $\alpha$ CD137/CD137L and  $\alpha$ Tim-3 stimulation axes. Each column represents a patient and each row a parameter (an immunometric). Grey cells indicate that the marker could not be evaluated for the corresponding patient. The total sums of positive immunometrics (out of the number of evaluated immunometrics) are shown for each marker (y-axis) or patient (x-axis). The most representative data for each axis are plotted on a graph appearing in Fig.1.

Supplementary Fig.6

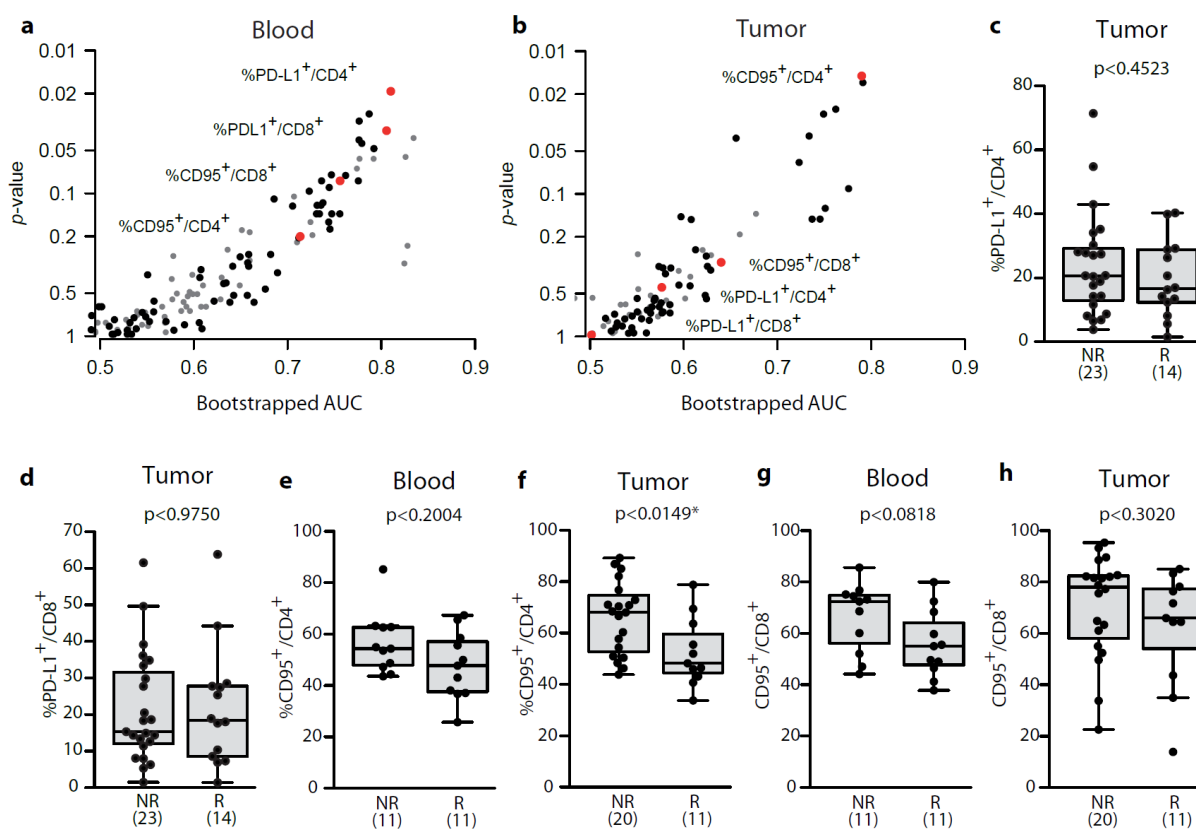

**Supplementary Figure 6. PD-L1 expression on TILs does not predict resistance to CTLA-4 blockade with the “*ex-vivo* mLN assay”.** **a-b.** Display of the Wilcoxon rank sum test *p*-values versus the bootstrapped AUC of the markers used to assess the sensitivity to anti-CTLA-4+anti-PD-1 Abs in the blood (**a**) and tumor (**b**) in the *ex vivo* mLN assay. Each dot represents one marker; selected biomarkers are shown in red while biomarkers with low level of expression are shown in grey. **c-d.** Expression levels of PD-L1 on CD4<sup>+</sup> (**c**) and CD8<sup>+</sup> (**d**) TILs respectively in lesions responding (R) or not (NR) to the *ex vivo* mLN assay in the anti-CTLA-4 mAb stimulatory condition. **e-h.** Expression levels of CD95 on CD4<sup>+</sup> (**e-f**) and CD8<sup>+</sup> (**g-h**) in blood (**e, g**) or TILs (**f, h**) respectively in responding (R) or not (NR) lesions in the *ex vivo* mLN assay testing the anti-CTLA-4 mAb stimulatory condition. Each dot represents one patient. The absolute numbers of patients are indicated in both groups. *p*-values were obtained by Wilcoxon rank sum test. Box and whiskers plot are represented from the corresponding distribution (**c-h**).

Supplementary Fig.7

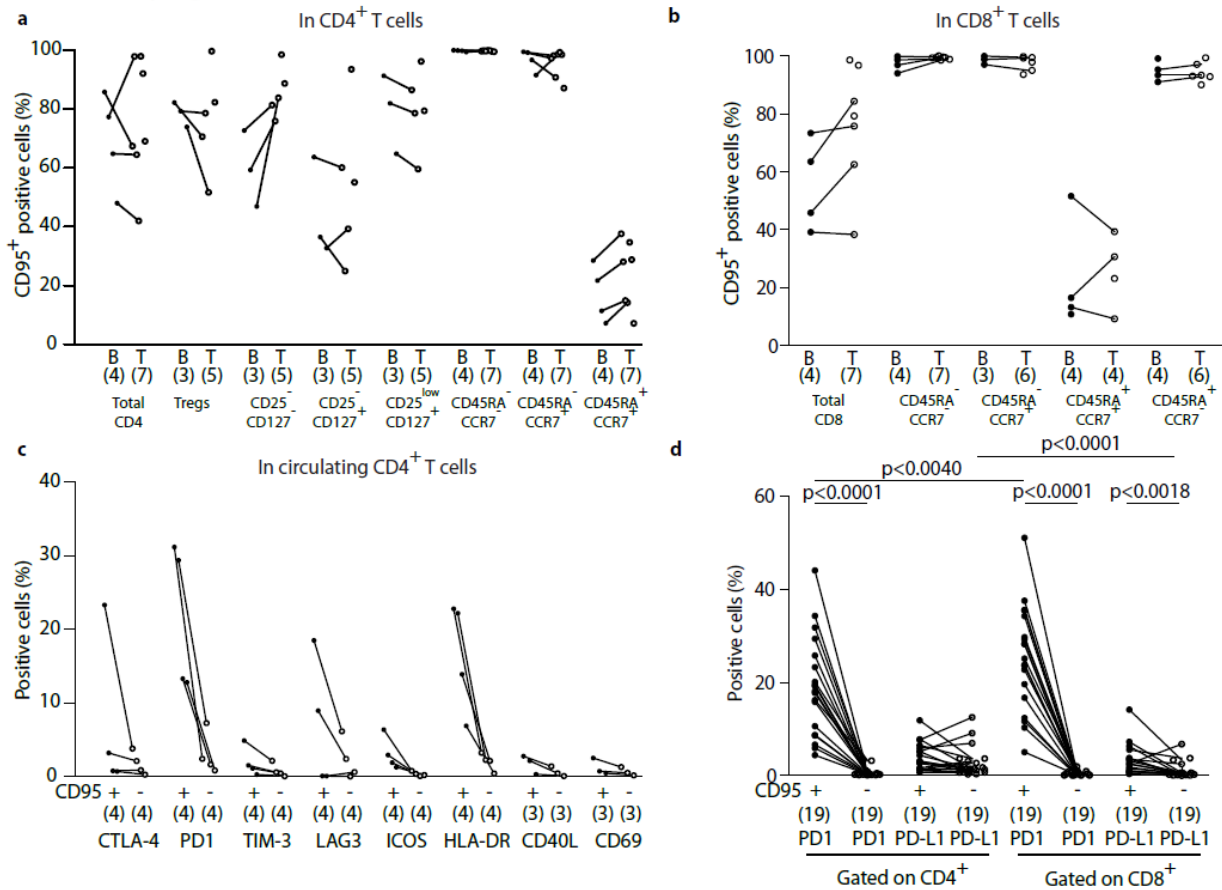

### Supplementary Figure 7. CD95<sup>+</sup> T cells are effector memory cells expressing PD-1 and HLA-DR. a-b.

Expression of CD95 on various CD4<sup>+</sup> (a) and CD8<sup>+</sup> (b) T cell subsets (defined using CD45RA, CCR7, CD127 and CD25 markers by flow cytometry analyses) in blood (B) and tumor (T) beds in 7 individuals diagnosed with stage III MMel. c. Expression of activation and exhaustion markers (indicated in the X axis) gating on CD95<sup>+</sup> (+) or CD95<sup>-</sup> (-) blood CD4<sup>+</sup> T cells in 7 individuals. d. CD95 expression according to PD1 and PD-L1 expression on circulating T cells. Each dot represents the value of one patient with the number of patients tested indicated in parentheses. *p*-values from Wilcoxon matched-pairs signed rank test are indicated.

Supplementary Fig.8

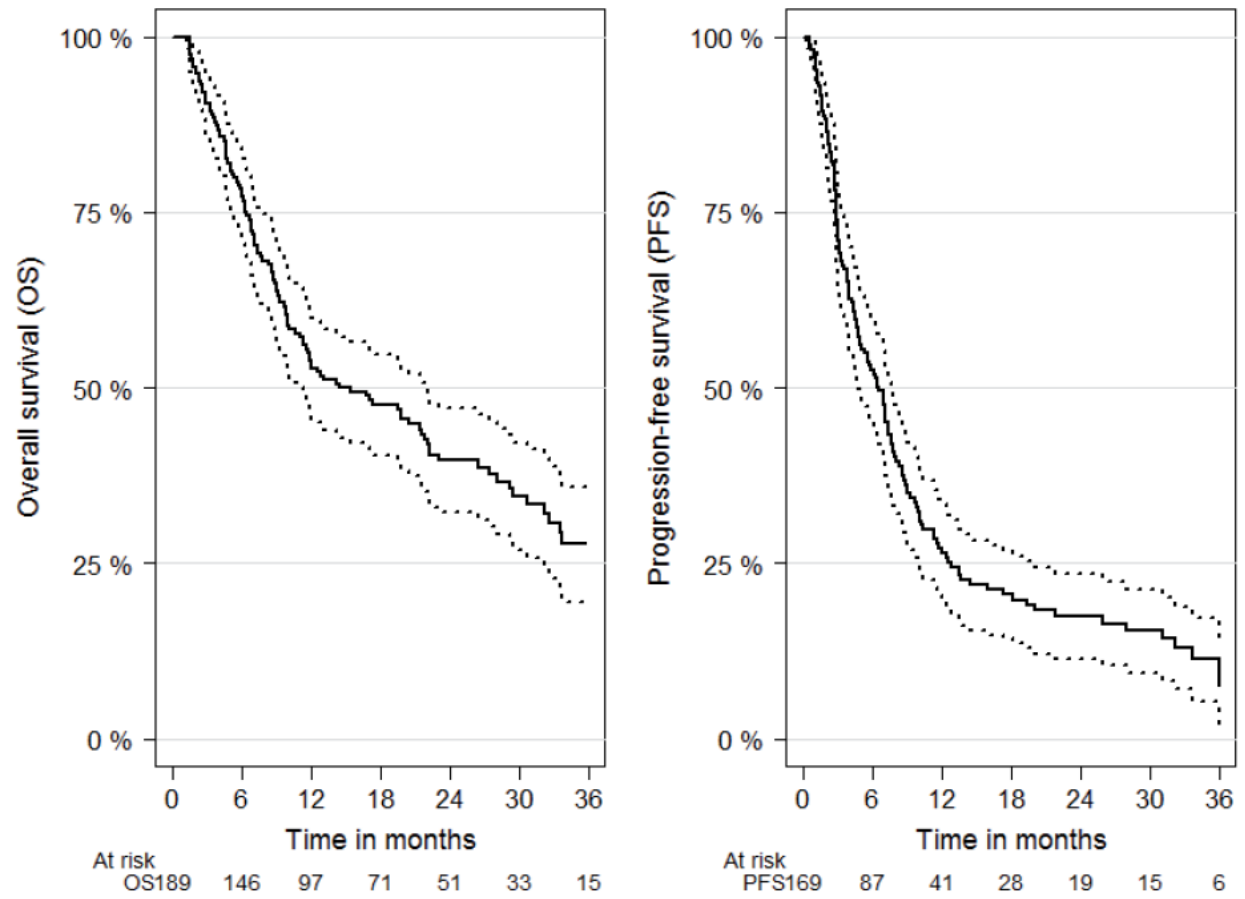

**Supplementary Figure 8. PFS and OS in the 8 cohorts of MMel patients treated with ipilimumab and described in Supplementary Table 2.**

Supplementary Fig.9

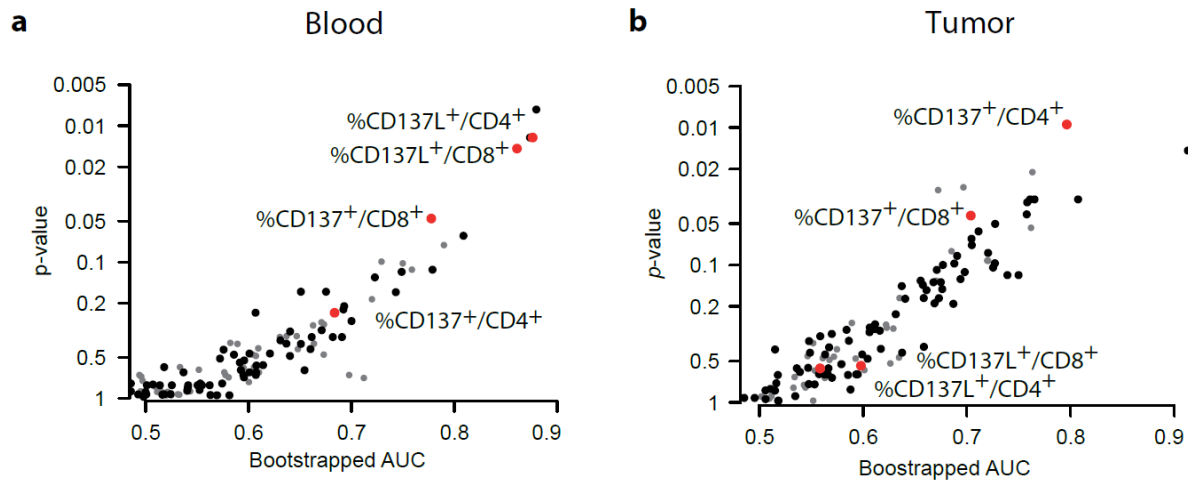

**Supplementary Figure 9. CD137/CD137L expression on blood and tumor T cells are the best predictive markers for the *ex vivo* responses to the combination of anti-CTLA-4 + anti-PD-1 Ab. a and b.** Display of the Wilcoxon rank sum test *p*-values versus the bootstrapped AUC of the markers used to assess the sensitivity to anti-CTLA-4+anti-PD-1 Abs in the blood (a) and tumor (d) in the *ex vivo* mLN assay. Each dot represents one marker; selected biomarkers are shown in red while biomarkers with low level of expression are shown in grey.

Supplementary Fig.10

Blood

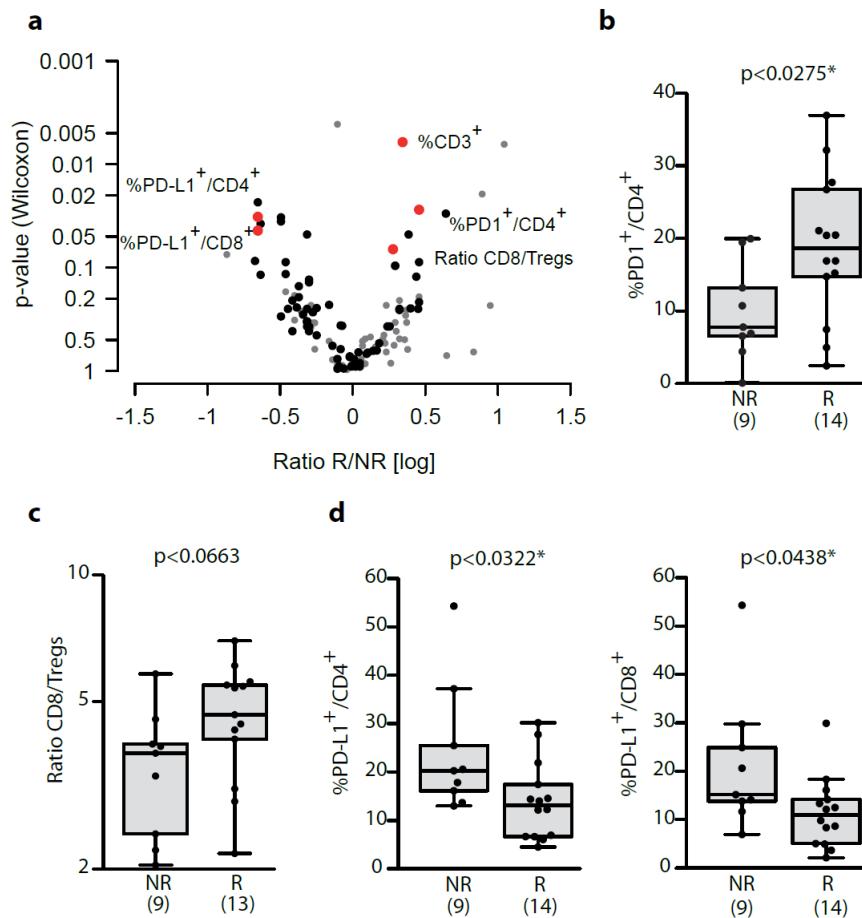

**Supplementary Figure 10. PD-1 and PD-L1 expression on blood T cells and the CD8<sup>+</sup> T cell/Treg ratio in blood predict responses to  $\alpha$ PD-1 mAb in *ex vivo* mLN assays.** **a.** Display of the Wilcoxon rank sum test *p*-values versus the log transformed ratio between responders (R) and non responders (NR) to anti-PD-1 mAb in the blood. Each dot represents one marker; selected biomarkers are shown in red while biomarkers with low level of expression are shown in grey. **b-d.** Expression levels of PD-1 (**b**) on blood CD4<sup>+</sup> T cells, CD8/Treg ratio (**c**) and PD-L1 (**d**) on CD4<sup>+</sup> and CD8<sup>+</sup> T cells in patient lesions responding (R) or not (NR) to the *ex vivo* mLN assay in  $\alpha$ PD-1 mAb stimulatory condition. Each dot represents one patient. The absolute numbers of patients are indicated in both groups. *p*-values obtained by Wilcoxon rank sum test are shown. Box and whiskers plot are represented from the corresponding distribution (**b-d**).

Supplementary Table 1. Detailed responses of patients treated with different ICB and cytokines.

| Patient                | Stimulation in ex vivo mLN assays |                 |                  |                           |                |                |               |               |                     |                  |
|------------------------|-----------------------------------|-----------------|------------------|---------------------------|----------------|----------------|---------------|---------------|---------------------|------------------|
|                        | αCTLA-4                           | αPD1            | αPD1+<br>αCTLA-4 | αCD137 and/<br>or αCD137L | IFNα2a         | IL-2           | αPD1+αTIM-3   | αTIM-3        | αCTLA-4 +<br>IFNα2a | αPD1 +<br>IFNα2a |
| Pt01                   | -                                 | -               | +                | +                         | +              | +              | n/d           | n/d           | +                   | +                |
| Pt02                   | +                                 | +               | +                | +                         | +              | +              | +             | +             | +                   | +                |
| Pt03                   | +                                 | +               | -                | -                         | +              | +              | +             | n/d           | -                   | -                |
| Pt04                   | +                                 | +               | -                | +                         | +              | +              | +             | -             | +                   | +                |
| Pt05                   | -                                 | -               | -                | -                         | n/d            | +              | -             | n/d           | n/d                 | n/d              |
| Pt06                   | -                                 | -               | +                | n/d                       | +              | +              | n/d           | n/d           | n/d                 | n/d              |
| Pt07                   | +                                 | +               | +                | n/d                       | +              | +              | n/d           | n/d           | n/d                 | n/d              |
| Pt08                   | +                                 | -               | +                | +                         | +              | +              | +             | n/d           | +                   | +                |
| Pt09                   | -                                 | +               | -                | -                         | +              | +              | n/d           | +             | n/d                 | +                |
| Pt10                   | -                                 | -               | +                | -                         | -              | +              | -             | n/d           | +                   | +                |
| Pt11                   | -                                 | -               | -                | -                         | +              | +              | -             | n/d           | +                   | +                |
| Pt12                   | -                                 | -               | -                | n/d                       | +              | +              | n/d           | n/d           | n/d                 | n/d              |
| Pt13                   | +                                 | -               | +                | n/d                       | +              | +              | n/d           | n/d           | n/d                 | n/d              |
| Pt14                   | -                                 | +               | +                | -                         | n/d            | +              | n/d           | n/d           | n/d                 | n/d              |
| Pt15                   | -                                 | -               | +                | +                         | +              | +              | n/d           | n/d           | n/d                 | n/d              |
| Pt16                   | +                                 | +               | +                | +                         | +              | +              | +             | +             | +                   | +                |
| Pt17                   | -                                 | -               | -                | +                         | +              | +              | n/d           | n/d           | n/d                 | n/d              |
| Pt18                   | -                                 | -               | -                | n/d                       | +              | +              | n/d           | n/d           | n/d                 | n/d              |
| Pt19                   | -                                 | -               | +                | +                         | +              | +              | n/d           | n/d           | n/d                 | n/d              |
| Pt20                   | -                                 | -               | -                | +                         | -              | +              | n/d           | n/d           | n/d                 | +                |
| Pt21                   | -                                 | +               | +                | +                         | +              | +              | n/d           | n/d           | n/d                 | n/d              |
| Pt22                   | -                                 | -               | -                | +                         | +              | +              | n/d           | +             | n/d                 | +                |
| Pt23                   | +                                 | -               | +                | +                         | +              | +              | +             | n/d           | +                   | +                |
| Pt24                   | +                                 | +               | +                | n/d                       | +              | +              | n/d           | n/d           | n/d                 | n/d              |
| Pt25                   | -                                 | +               | -                | +                         | +              | +              | n/d           | -             | n/d                 | +                |
| Pt26                   | +                                 | +               | +                | +                         | +              | +              | n/d           | +             | n/d                 | +                |
| Pt27                   | -                                 | -               | -                | -                         | -              | -              | -             | n/d           | -                   | -                |
| Pt28                   | -                                 | -               | -                | n/d                       | -              | -              | n/d           | n/d           | n/d                 | n/d              |
| Pt29                   | -                                 | +               | n/d              | -                         | -              | -              | -             | -             | -                   | -                |
| Pt30                   | +                                 | +               | -                | +                         | +              | -              | n/d           | n/d           | +                   | +                |
| Pt31                   | -                                 | -               | n/d              | -                         | +              | -              | n/d           | -             | +                   | -                |
| Pt32                   | -                                 | -               | n/d              | -                         | -              | -              | n/d           | -             | -                   | -                |
| Pt33                   | +                                 | +               | +                | +                         | n/d            | n/d            | n/d           | n/d           | n/d                 | n/d              |
| Pt34                   | +                                 | +               | -                | -                         | n/d            | n/d            | n/d           | +             | n/d                 | n/d              |
| Pt35                   | +                                 | +               | -                | +                         | n/d            | n/d            | n/d           | n/d           | n/d                 | n/d              |
| Pt36                   | -                                 | -               | -                | n/d                       | +              | n/d            | n/d           | n/d           | +                   | +                |
| Pt37                   | -                                 | -               | -                | n/d                       | n/d            | n/d            | n/d           | n/d           | n/d                 | n/d              |
| Total R/NR<br>(% of R) | 14/23<br>(37.8)                   | 16/21<br>(43.2) | 16/18<br>(47.1)  | 17/11<br>(60.7)           | 25/6<br>(80.6) | 26/6<br>(81.2) | 6/5<br>(54.5) | 6/5<br>(54.5) | 11/4<br>(73.3)      | 15/5<br>(75)     |

n/d : not done

Supplementary Table 2: Cohorts and patient's characteristics

|                 | Overall (190) | CA (19)   | CH (16)   | DE (3)   | DK (67)   | FR (15)   | IT (10)   | OR (20)   | JE (40)   |
|-----------------|---------------|-----------|-----------|----------|-----------|-----------|-----------|-----------|-----------|
| Gender          |               |           |           |          |           |           |           |           |           |
| Female          | 93 (49%)      | 8 (42%)   | 5 (31%)   | 0 (0%)   | 36 (54%)  | 12 (80%)  | 4 (40%)   | 9 (45%)   | 19 (47%)  |
| Male            | 97 (51%)      | 11 (58%)  | 11 (69%)  | 3 (100%) | 31 (46%)  | 3 (20%)   | 6 (60%)   | 11 (55%)  | 21 (53%)  |
| Age             |               |           |           |          |           |           |           |           |           |
| Mean (SD)       | 61 (13)       | 64 (12)   | 58 (15)   | 64 (11)  | 63 (12)   | 66 (14)   | 56 (16)   | 59 (13)   | 58 (14)   |
| LDH             |               |           |           |          |           |           |           |           |           |
| Low             | 112 (62%)     | 6 (32%)   | 13 (100%) | 1 (33%)  | 56 (85%)  | 11 (73%)  | 2 (22%)   | 6 (30%)   | 17 (47%)  |
| High            | 69 (38%)      | 13 (68%)  | 0 (0%)    | 2 (67%)  | 10 (15%)  | 4 (27%)   | 7 (78%)   | 14 (70%)  | 19 (53%)  |
| Missing         | 9             | 0         | 3         | 0        | 1         | 0         | 1         | 0         | 4         |
| Tumor stage     |               |           |           |          |           |           |           |           |           |
| III             | 13 (7%)       | 1 (5%)    | 2 (12%)   | 0 (0%)   | 0 (0%)    | 8 (53%)   | 1 (10%)   | 1 (5%)    | 0 (0%)    |
| IV              | 177 (93%)     | 18 (95%)  | 14 (88%)  | 3 (100%) | 67 (100%) | 7 (47%)   | 9 (90%)   | 19 (95%)  | 40 (100%) |
| Tumor response  |               |           |           |          |           |           |           |           |           |
| PD              | 127 (67%)     | 11 (58%)  | 13 (81%)  | 3 (100%) | 42 (63%)  | 2 (13%)   | 6 (60%)   | 17 (85%)  | 33 (83%)  |
| SD              | 31 (16%)      | 1 (5%)    | 1 (6%)    | 0 (0%)   | 14 (21%)  | 7 (47%)   | 4 (40%)   | 0 (0%)    | 4 (10%)   |
| PR              | 18 (9%)       | 6 (32%)   | 0 (0%)    | 0 (0%)   | 9 (13%)   | 2 (13%)   | 0 (0%)    | 1 (5%)    | 0 (0%)    |
| CR              | 14 (7%)       | 1 (5%)    | 2 (12%)   | 0 (0%)   | 2 (3%)    | 4 (27%)   | 0 (0%)    | 2 (10%)   | 3 (8%)    |
| Previous CT     |               |           |           |          |           |           |           |           |           |
| Yes             | 71 (42%)      | 9(47%)    | 8 (50%)   | 2 (67%)  | 11 (16%)  | 3 (20%)   | 8 (80%)   | 0 (0%)    | 30 (75%)  |
| Missing         | 20            | 0         | 0         | 0        | 0         | 0         | 0         | 20        | 0         |
| Previous IT     |               |           |           |          |           |           |           |           |           |
| Yes             | 66 (35%)      | 4 (21%)   | 1 (6%)    | 1 (33%)  | 19 (28%)  | 11 (73%)  | 3 (30%)   | 14 (70%)  | 13 (32%)  |
| Previous PKI    |               |           |           |          |           |           |           |           |           |
| Yes             | 16 (9%)       | 2 (11%)   | 3 (19%)   | 1 (33%)  | 3 (4%)    | 1 (7%)    | 3 (30%)   | 0 (0%)    | 3 (8%)    |
| Missing         | 20            | 0         | 0         | 0        | 0         | 0         | 0         | 20        | 0         |
| Ipilimumab dose |               |           |           |          |           |           |           |           |           |
| 3 mg/kg         | 143 (88%)     | 0 (0%)    | 16 (100%) | 3 (100%) | 67 (100%) | 15 (100%) | 10 (100%) | 20 (100%) | 12 (100%) |
| 10 mg/kg        | 19 (12%)      | 19 (100%) | 0 (0%)    | 0 (0%)   | 0 (0%)    | 0 (0%)    | 0 (0%)    | 0 (0%)    | 0 (0%)    |
| Missing         | 28            | 0         | 0         | 0        | 0         | 0         | 0         | 0         | 28        |
| Co-treatment    |               |           |           |          |           |           |           |           |           |
| GMCSF           | 19 (10%)      | 19 (100%) | 0 (0%)    | 0 (0%)   | 0 (0%)    | 0 (0%)    | 0 (0%)    | 0 (0%)    | 0 (0%)    |
| IL2             | 3 (2%)        | 0 (0%)    | 0 (0%)    | 3 (100%) | 0 (0%)    | 0 (0%)    | 0 (0%)    | 0 (0%)    | 0 (0%)    |

PD: progression disease, SD: stable disease, PR: partial response, CR: complete response, CT: chemotherapy and/or radiation, IT: immunotherapy, PKI: protein kinase inhibitors



Supplementary Table 3: Clinical prognostic parameters for Ipilimumab responses (PD vs SD+PR+CR), OS and PFS

|                                    | Tumor response                        | Overall survival                      | Progression - free survival           |
|------------------------------------|---------------------------------------|---------------------------------------|---------------------------------------|
| Age                                | 1.002<br>[0.997 ; 1.007]<br>P = 0.468 | 0.992<br>[0.977 ; 1.006]<br>P = 0.268 | 0.992<br>[0.979 ; 1.006]<br>P = 0.253 |
| Gender<br>(ref = 'female')         | 0.94<br>[0.83 ; 1.07]<br>P = 0.38     | 1.09<br>[0.76 ; 1.58]<br>P = 0.63     | 1.26<br>[0.89 ; 1.77]<br>P = 0.20     |
| LDH<br>(ref = 'low')               | 0.87<br>[0.74 ; 1.01]<br>P = 0.068    | 2.31<br>[1.47 ; 3.62]<br>P < 0.001    | 1.51<br>[0.96 ; 2.38]<br>P = 0.073    |
| Previous CT<br>(ref = 'no')        | 0.92<br>[0.79 ; 1.08]<br>P = 0.32     | 1.62<br>[1.02 ; 2.58]<br>P = 0.043    | 1.01<br>[0.68 ; 1.48]<br>P = 0.97     |
| Previous IT<br>(ref = 'no')        | 1.08<br>[0.94 ; 1.25]<br>P = 0.27     | 0.71<br>[0.47 ; 1.08]<br>P = 0.11     | 0.77<br>[0.53 ; 1.13]<br>P = 0.18     |
| Previous PKI<br>(ref = 'no')       | 0.74<br>[0.58 ; 0.93]<br>P = 0.012    | 2.04<br>[1.01 ; 4.09]<br>P = 0.046    | 1.95<br>[1.04 ; 3.67]<br>P = 0.038    |
| Tumor stage<br>(ref = 'stage III') | 1.03<br>[0.77 ; 1.40]<br>P = 0.83     | 1.01<br>[0.29 ; 3.47]<br>P = 0.99     | 0.55<br>[0.21 ; 1.43]<br>P = 0.22     |

All models were stratified on the center. Odds Ratio (for the tumor response) and Hazard Ratio (for the survival endpoints) with 95% confidence intervals. CT: chemotherapy and/or radiation, IT: immunotherapy, PKI: protein kinase inhibitors.

Supplementary Table 4: Association between CD95 and PD-L1 (continuous scale) and the ipilimumab responses (PD vs SD+PR+CR)

| Model                                                                                | CD95.CD4                              | CD95.CD8                             | PDL1.CD4                             | PDL1.CD8                              |
|--------------------------------------------------------------------------------------|---------------------------------------|--------------------------------------|--------------------------------------|---------------------------------------|
| Univariate                                                                           | 0.978<br>[0.959 ; 0.997]<br>P = 0.023 | 0.992<br>[0.973 ; 1.011]<br>P = 0.40 | 0.996<br>[0.959 ; 1.034]<br>P = 0.84 | 0.977<br>[0.947 ; 1.006]<br>P = 0.13  |
| Stratify on center                                                                   | 0.979<br>[0.958 ; 1.001]<br>P = 0.060 | 1.007<br>[0.984 ; 1.032]<br>P = 0.56 | 0.995<br>[0.941 ; 1.053]<br>P = 0.87 | 0.972<br>[0.924 ; 1.020]<br>P = 0.25  |
| Stratify on center<br>Adjust for LDH, gender,<br>age, tumor stage, CT, IT<br>and PKI | 0.980<br>[0.955 ; 1.005]<br>P = 0.12  | 1.000<br>[0.968 ; 1.031]<br>P = 0.98 | 0.963<br>[0.893 ; 1.033]<br>P = 0.31 | 0.937<br>[0.869 ; 1.001]<br>P = 0.068 |

Odds ratios and 95% confidence intervals. Final model in grey.

Supplementary Table 5: Association between CD95 and PD-L1 (continuous scale) and the progression free- and overall survivals

| Progression free survival                                                            |                                       |                                       |                                       |                                       |
|--------------------------------------------------------------------------------------|---------------------------------------|---------------------------------------|---------------------------------------|---------------------------------------|
| Model                                                                                | CD95.CD4                              | CD95.CD8                              | PDL1.CD4                              | PDL1.CD8                              |
| Univariate                                                                           | 1.007<br>[0.997 ; 1.017]<br>P = 0.19  | 0.996<br>[0.986 ; 1.006]<br>P = 0.44  | 1.021<br>[0.999 ; 1.043]<br>P = 0.057 | 1.021<br>[1.001 ; 1.042]<br>P = 0.040 |
| Stratify on center                                                                   | 1.001<br>[0.989 ; 1.012]<br>P = 0.92  | 0.998<br>[0.986 ; 1.009]<br>P = 0.69  | 1.022<br>[0.993 ; 1.051]<br>P = 0.15  | 1.016<br>[0.986 ; 1.046]<br>P = 0.30  |
| Stratify on center<br>Adjust for LDH, gender,<br>age, tumor stage, CT, IT<br>and PKI | 1.004<br>[0.991 ; 1.017]<br>P = 0.59  | 0.999<br>[0.984 ; 1.015]<br>P = 0.93  | 1.044<br>[1.011 ; 1.079]<br>P = 0.009 | 1.032<br>[0.999 ; 1.065]<br>P = 0.056 |
| Overall Survival                                                                     |                                       |                                       |                                       |                                       |
| Model                                                                                | CD95.CD4                              | CD95.CD8                              | PDL1.CD4                              | PDL1.CD8                              |
| Univariate                                                                           | 1.010<br>[0.999 ; 1.022]<br>P = 0.082 | 1.013<br>[1.001 ; 1.025]<br>P = 0.031 | 1.036<br>[1.012 ; 1.059]<br>P = 0.003 | 1.043<br>[1.023 ; 1.063]<br>P < 0.001 |
| Stratify on center                                                                   | 1.009<br>[0.996 ; 1.022]<br>P = 0.16  | 1.001<br>[0.989 ; 1.014]<br>P = 0.83  | 1.027<br>[0.993 ; 1.062]<br>P = 0.12  | 1.045<br>[1.015 ; 1.076]<br>P = 0.003 |
| Stratify on center<br>Adjust for LDH, gender,<br>age, tumor stage, CT, IT<br>and PKI | 1.010<br>[0.994 ; 1.027]<br>P = 0.21  | 1.009<br>[0.991 ; 1.028]<br>P = 0.33  | 1.041<br>[0.995 ; 1.089]<br>P = 0.081 | 1.053<br>[1.012 ; 1.096]<br>P = 0.011 |

Hazard ratios and 95% confidence intervals. Final model in grey.

Supplementary Table 6: Association between CD95/CD4 (&gt;70 vs. ≤70) and overall survival

|                                       | Hazard Ratio | 95% CI          | p-value |
|---------------------------------------|--------------|-----------------|---------|
| Expression of CD95/CD4 (> 70 vs. ≤70) | 1.96         | [1.10 - 3.48]   | 0.022   |
| <i>LDH status</i>                     | 2.61         | [1.51 - 4.52]   | 0.001   |
| <i>Age</i>                            | 0.979        | [0.963 - 0.996] | 0.018   |
| <i>Gender</i>                         | 0.90         | [0.58 - 1.42]   | 0.66    |
| <i>Tumor stage</i>                    | 0.61         | [0.11 - 3.29]   | 0.56    |
| <i>Previous CT</i>                    | 1.36         | [0.78 - 2.39]   | 0.28    |
| <i>Previous IT</i>                    | 0.76         | [0.46 - 1.24]   | 0.27    |
| <i>Previous PKI</i>                   | 1.33         | [0.60 - 2.95]   | 0.48    |

CI: confidence interval. Adjusting covariates are in italic

Supplementary Table 7: Reagents used for mLN *ex-vivo* assay

| Stimulation Condition | Clone           | Source                  | Final Conc. |
|-----------------------|-----------------|-------------------------|-------------|
| Medium control        |                 |                         |             |
| mlgG1                 | 11711           | R&D                     | 10µg/ml     |
| anti-PD-1             | PD1m.3          | Dr. Chen's lab          | 10µg/ml     |
| anti-PD-L1            | 5H1             | Dr. Chen's lab          |             |
| anti-Tim-3            | 2E2             | Dr. Kuchroo's lab       | 10µg/ml     |
| anti-CTLA-4           | BMS -<br>734016 | Yervoy                  | 10µg/ml     |
| anti-CD137            | 6B4             | Dr. Choi's lab          | 5µg/ml      |
| anti-CD137L           | 5F4             | Dr. Choi's lab          | 5µg/ml      |
| IL-2                  |                 | (Proleukine®) Novartis  | 100 IU/ml   |
| IFN-α2A               |                 | (Roferon®) Roche Pharma | 1000 IU/ml  |

Supplementary Table 8: List of monoclonal antibodies for flow cytometry

| Name             | Fluorochrome | Company      | Reference   | Clone         |
|------------------|--------------|--------------|-------------|---------------|
| CD8              | FITC         | BD           | 555366      | RPA -T8       |
| CD4              | PerCP        | BD           | 345770      | SK3           |
| CD56             | PE Cy7       | Beckman      | A21692      | N901          |
| CD3              | VioBlue      | Miltenyi     | 130-094-363 | OKT3          |
| Dead cells       | Yellow       | Invitrogen   | L34957      | -             |
| CD45             | APC AF750    | Beckman      | A79392      | J.33          |
| Tim -3           | APC          | eBiosciences | 17-3109-42  | F38-2E2       |
| CD152 (CTLA - 4) | PE           | BD           | 555853      | BNI3          |
| CD137 (CD137)    | APC          | Biolegend    | 309810      | 4B4-1         |
| CD137L (CD137L)  | PE           | BD           | 559446      | C65-485       |
| CD274 (PD -L1)   | APC          | Biolegend    | 329708      | 29E.2A3       |
| CD95 (Fas)       | APC          | BD           | 558814      | DX2           |
| CD95 (Fas)       | PE           | BD           | 555674      | DX2           |
| CD178 (FasL)     | PE           | eBiosciences | 12-9919-42  | NOK -1        |
| CD69             | APC          | BD           | 555531      | FN50          |
| CD69             | PerCP        | BioLegend    | 310928      | FN50          |
| CD25             | PE           | BD           | 555432      | M-A251        |
| CD45RA           | PE           | BD           | 555489      | HI100         |
| CD314 (NKG2D)    | PE           | Miltenyi     | 130-092-672 | BAT221        |
| CD27             | PE           | BD           | 555441      | M-T271        |
| CD279 (PD - 1)   | PE Cy7       | Beckman      | A78885      | PD-1.3.5      |
| CD27             | APC          | BD           | 558664      | M-T271        |
| CD127            | APC          | Miltenyi     | 130-094-890 | MB15 -18C9    |
| LAG3             | FITC         | R&D          | FAB2319F    | Polyclonal Ab |
| CD14             | FITC         | BD           | 555397      | M5E2          |
| CD15             | PB           | BioLegend    | 323022      | W6D3          |
| HLA DP/DR/DQ     | APC          | Miltenyi     | 130-104-824 | REA332        |
| HLA - DR         | Pacific Blue | Beckman      | A74781      | Immu-357      |
| CD11c            | PE Cy7       | BioLegend    | 301608      | 3.9           |
| CD11b            | PE Cy7       | BD           | 557743      | ICRF44        |
| CD19             | PE Cy7       | BD           | 557835      | SJ25C1        |
| CD20             | PE           | Miltenyi     | 130-091-109 | LT20          |
| TNF $\alpha$     | AF647        | Biolegend    | 502916      | Mab11         |
| IFN $\gamma$     | PE           | BD           | 559327      | B27           |
| Ki67             | PE           | BD           | 556027      | B56           |
| Foxp3            | APC          | eBiosciences | 17-4776-42  | PCH101        |
| ICOS             | PE           | BD           | 557802      | DX29          |
| CCR7             | BV421        | BioLegend    | 353208      | G043H7        |
| CD40L            | FITC         | BD           | 555699      | TRAP1         |
